# Supplementary material for: Atomic-scale investigations on the wet etching kinetics of GeversusSiGe in acidic H2O2solutions: a postoperandosynchrotron XPS analysis
Source: Royal Society of Chemistry journal article supplement (doi:10.1039/d0tc02763d), 2020-01-01
Supplement: d0tc02763d1.pdf [file d0tc02763d1.pdf]

**Atomic scale investigations on the wet etching kinetics of Ge versus SiGe in  
acidic H<sub>2</sub>O<sub>2</sub> solutions: a *post operando* synchrotron XPS analysis**

Graniel Harne A. Abrenica<sup>a,b,\*</sup>, Mikhail V. Lebedev<sup>c</sup>, Mathias Fingerle<sup>d</sup>, Sophia Arnauts<sup>b</sup>,  
Nazaninsadat Bazzazian<sup>b</sup>, Wolfram Calvet<sup>d</sup>, Clement Porret<sup>b</sup>,  
Hugo Bender<sup>b</sup>, Thomas Mayer<sup>d</sup>, Stefan de Gendt<sup>a,b</sup> and Dennis H. van Dorp<sup>b</sup>

<sup>a</sup> *Department of Chemistry, Katholieke Universiteit Leuven, B-3001 Leuven, Belgium*

<sup>b</sup> *Imec, B-3001 Leuven, Belgium*

<sup>c</sup> *Ioffe Institute, St. Petersburg 194021, Russia*

<sup>d</sup> *Institute of Materials Science, Darmstadt University of Technology, 64287 Darmstadt, Germany*

**SUPPLEMENTARY INFORMATION**

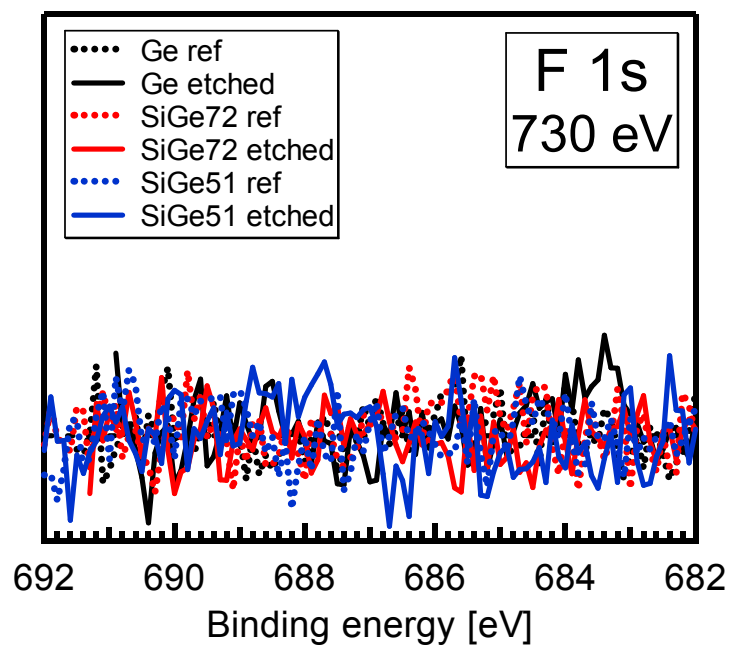

**Figure S1.** F1s (730 eV) core-level spectra of Ge,  $\text{Si}_{0.28}\text{Ge}_{0.72}$  and  $\text{Si}_{0.49}\text{Ge}_{0.51}$  before and after etching in 0.1 M HCl/10 mM  $\text{H}_2\text{O}_2$ .

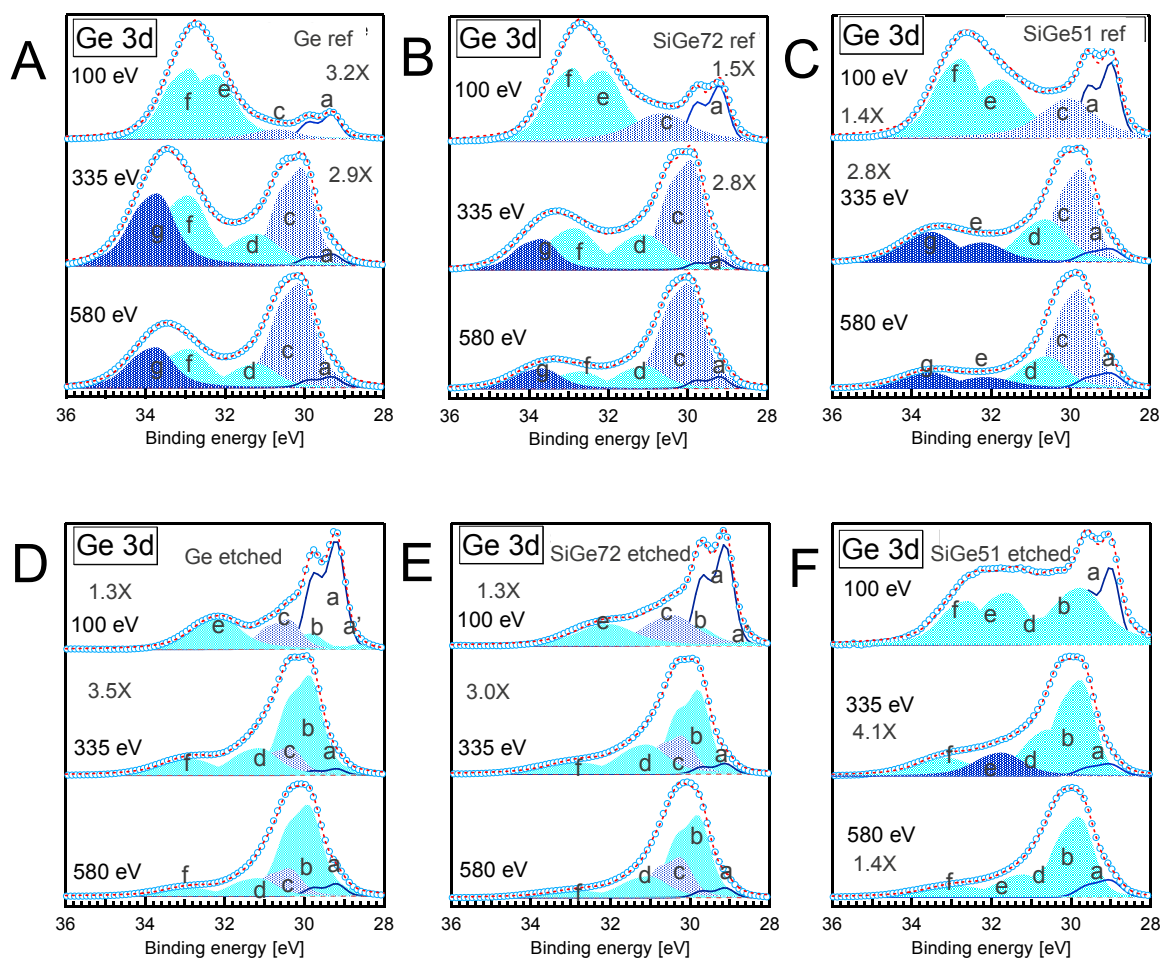

**Figure S2.** Comparison of Ge3d core-level spectra for different excitation energies of A, D) Ge, B, E)  $\text{Si}_{0.28}\text{Ge}_{0.72}$  and C, F)  $\text{Si}_{0.49}\text{Ge}_{0.51}$  before and after etching in 0.1 M HCl/10 mM  $\text{H}_2\text{O}_2$ . Label: a')  $\text{Ge}_{(s)}$ , a)  $\text{Ge}_{\text{bulk}}$ , b) Ge-Cl, c) Ge-OH, d)  $\text{Ge}^{2+}$ , e)  $\text{Ge}^{3+}$ , f)  $\text{Ge}^{4+}$  and g)  $\text{Ge}(\text{OH})_2^{2+}$ .

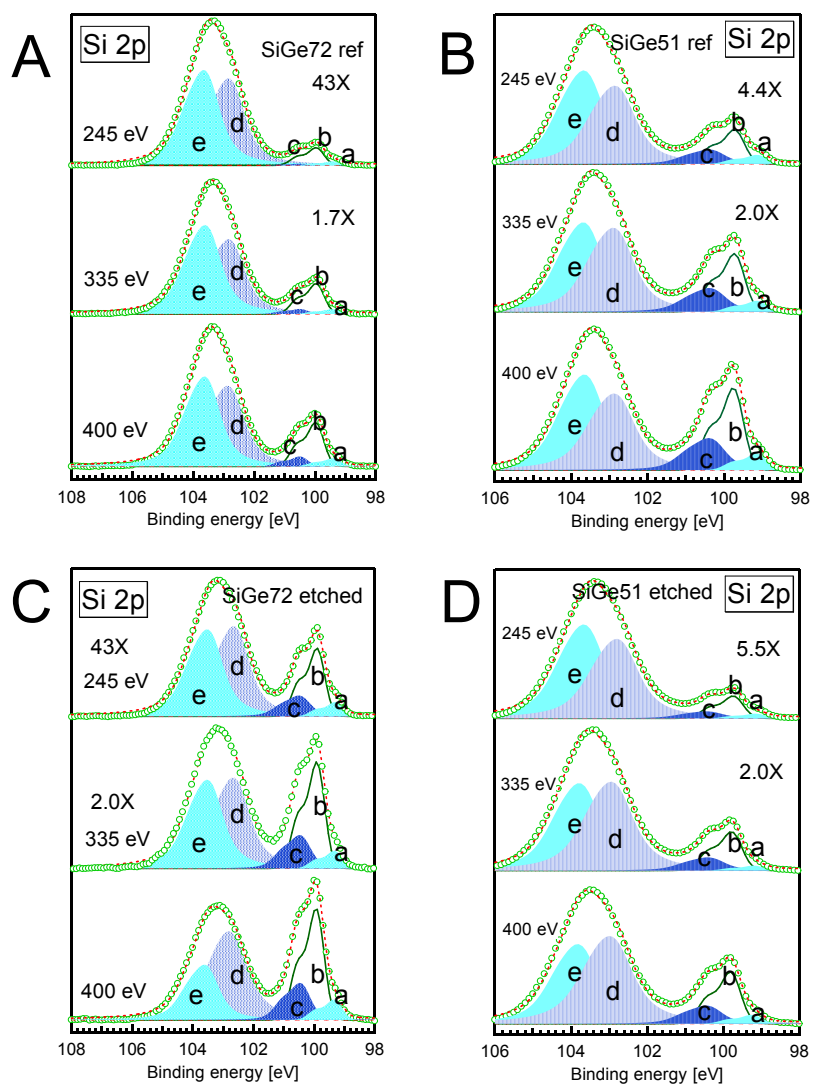

**Figure S3.** Comparison of S2p core-level spectra for different excitation energies of A, C)  $\text{Si}_{0.28}\text{Ge}_{0.72}$  and B, D)  $\text{Si}_{0.49}\text{Ge}_{0.51}$  before and after etching in 0.1 M HCl/10 mM  $\text{H}_2\text{O}_2$ . Label: a) Si-Ge<sub>(s)</sub>, b) Si<sub>bulk</sub>, c) Si<sup>1+</sup>, d) Si<sup>3+</sup> and e) Si<sup>4+</sup>.
